# Supplementary material
Source: PubMed Central journal article supplement (PMC4035928)
Supplement: 1319955111_pnas.201319955SI.pdf [file 1319955111_pnas.201319955SI.pdf]

# Supporting Information

Choi et al. 10.1073/pnas.1319955111

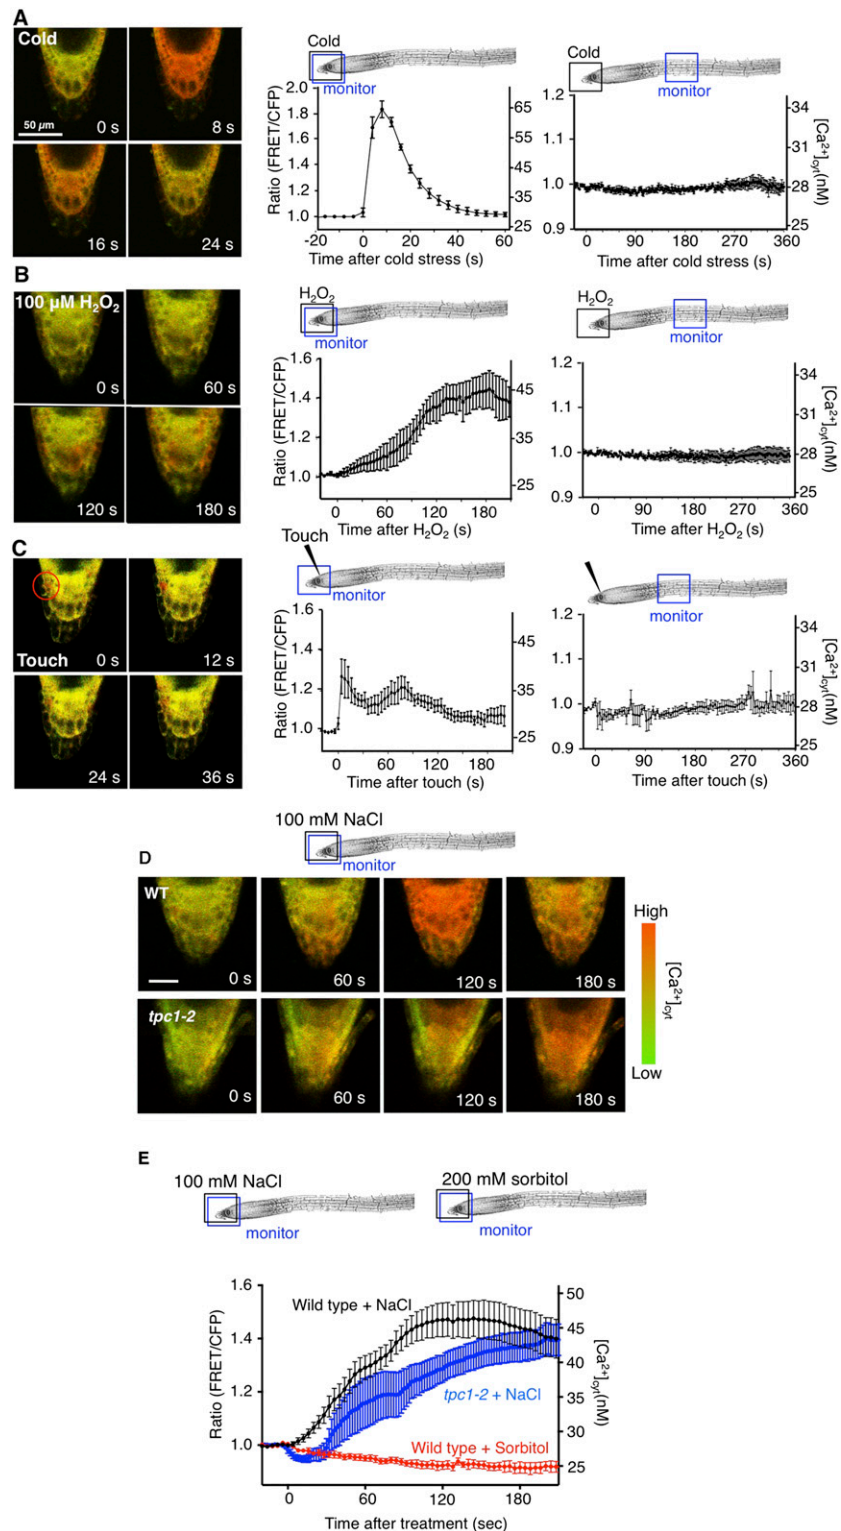

**Fig. S1.** Cytoplasmic  $Ca^{2+}$  changes in response to abiotic stress. (A) Cold (4 °C medium), (B) 100  $\mu$ M  $H_2O_2$ , (C) touch stress, or (D) 100 mM NaCl or 200 mM sorbitol as a control were applied to the apical ~50  $\mu$ m of the root tip of an *Arabidopsis* plant expressing the FRET-based  $Ca^{2+}$  sensor YCNano-65.  $Ca^{2+}$  changes Legend continued on following page





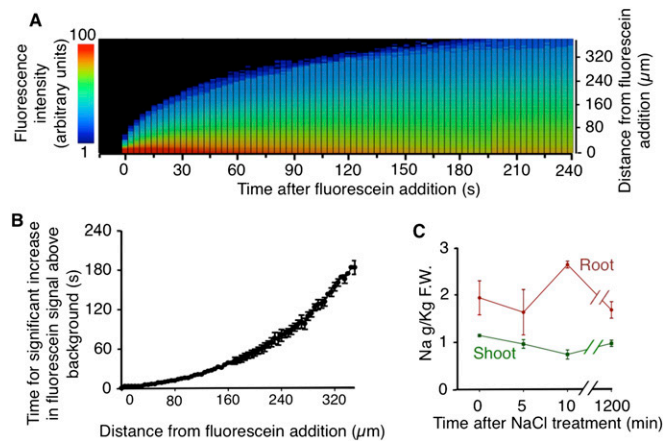

**Fig. 54.** Passive movement of fluorescein through the growth medium gel and salt movement through the seedling. (A) Fifty micromolar fluorescein was added into a window in the medium gel at time 0 s to monitor passive small-molecule movement through the gel. Fluorescein movement was imaged using a Zeiss LSM 510 and quantitative analysis of images performed as described for analysis of ratio images of the YCNano-65 confocal images in Fig. 1. Average fluorescein signal intensity was extracted from a region of interest (ROI) (5-μm long × 128-μm wide) that was sequentially scanned over 380-μm length of the gel medium. Analysis was repeated on images taken every 3.15 s for 4.5 min, and then the data were extracted from four trials averaged and pseudocolor-coded. (B) The time for the fluorescein signal to significantly increase above background ( $P < 0.05$ ,  $t$  test) over distance from point of addition to the gel (mean  $\pm$  SEM;  $n = 4$ ). (C) Time course of Na accumulation in roots responding to local salt stimulation and in systemic shoot tissue. Ten-day-old seedlings were locally stimulated with 100 mM NaCl in the root tip region. Root and leaf (shoot) tissues were harvested (5.1–13.8 mg for root, 28.7–82 mg for shoot) at 0 (control), 5, 10, and 1,200 min (20 h) after salt stress with 100 mM NaCl applied to the root tip. Sodium was analyzed using inductively coupled plasma optical emission spectroscopy (ICP-OES). Results are mean ( $\pm$ SD);  $n = 8$ –12 from three independent experiments.

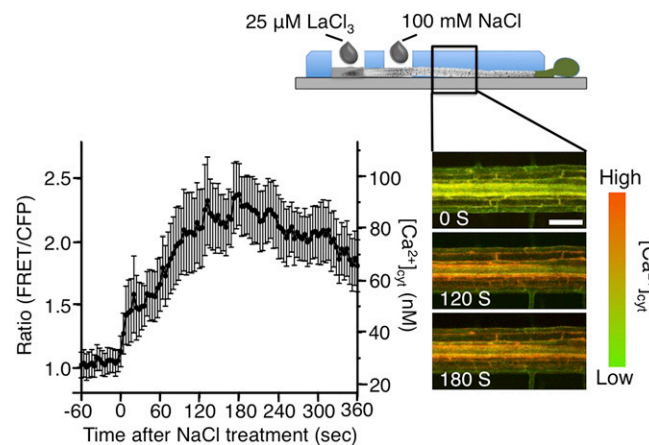

**Fig. 55.** Site-specific effect of Ca<sup>2+</sup> channel blocker on salt-induced Ca<sup>2+</sup> waves. Systemic Ca<sup>2+</sup> waves were monitored shootward of the 100 mM NaCl-stimulated middle root region. Root tips were treated with 25 μM LaCl<sub>3</sub> 30 min before salt stress, which was applied 1,000 μm shootward of the tip. Ca<sup>2+</sup> levels were then monitored 1,000 μm shootward of the site of NaCl treatment (see *Inset* diagram). Data are representative ratio images (*Left*) and corresponding quantitation of FRET/CFP ratio and calculated absolute [Ca<sup>2+</sup>]<sub>cyt</sub> to the *Right*. The speed of the systemic Ca<sup>2+</sup> wave from these experiments is 397.5  $\pm$  42.1 μm/s (mean  $\pm$  SEM;  $n = 13$ ).

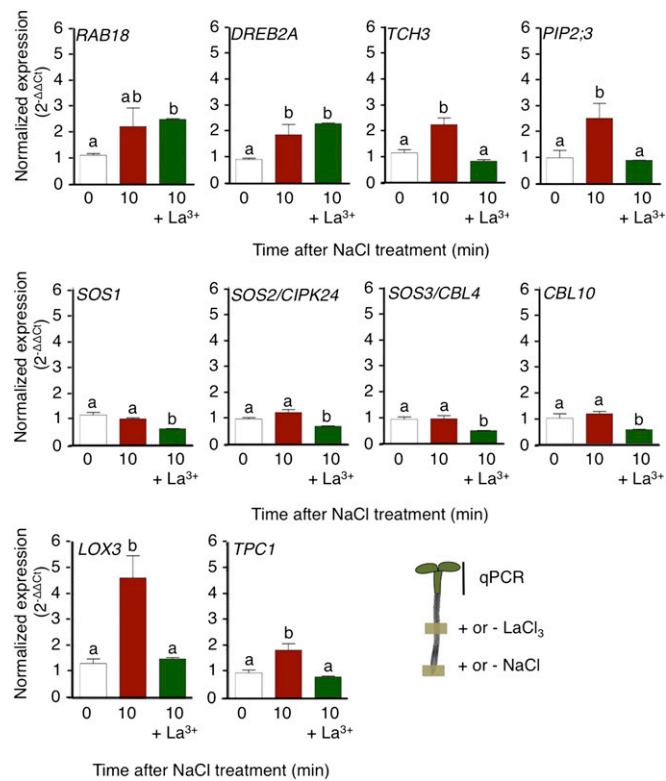

**Fig. S6.** Effect of blocking the salt stress-induced  $\text{Ca}^{2+}$  wave on shoot gene expression. qPCR analysis of time course of induction of genes in systemic shoot in response to local 100 mM NaCl stress of the root tip, using  $25 \mu\text{M}$   $\text{LaCl}_3$  between root tip and shoot to block  $\text{Ca}^{2+}$  wave propagation (see *Inset* diagram). Results are mean  $\pm$  SEM;  $n = 4-6$  from three independent experiments. Each gene is normalized to its own 0-min shoot value. The  $25 \mu\text{M}$   $\text{LaCl}_3$  blockade was added between root tip and shoot tissues for 30 min before local salt treatment in root tip region. Note that data on *TCH2*, *ZAT12*, and *SID2* are presented in Fig. 3C. "a" and "b" denote statistical significance of  $t$  test to the 0-min control. Same letters show no statistical significance at  $P < 0.05$ .

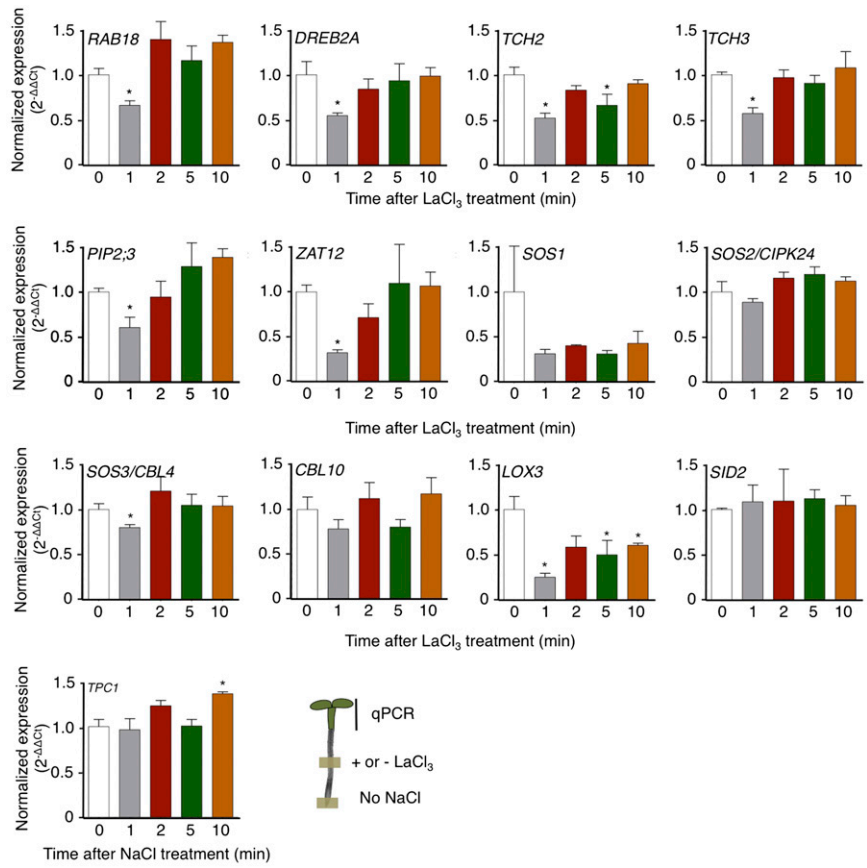

**Fig. S7.** qPCR analysis of time course of induction of genes in systemic shoot tissues in response to 25 μM LaCl<sub>3</sub> (the quantitative data for Fig. 3B). LaCl<sub>3</sub> was added as for experiments to block NaCl-induced Ca<sup>2+</sup> wave propagation but no NaCl treatment was applied (see *Inset*). Shoot tissues were harvested, and gene expression was analyzed by qPCR with each gene being normalized to its own 0-min value. Results are mean ± SEM; n = 4–6 from three separate experiments. The asterisk (\*) represents statistical significance (P < 0.05, t test) in comparison with each gene's 0 min.







**Table S1. qPCR primers used in this study**

| Name      | Sequence, 5' to 3'                    | Target/direction       | Length |
|-----------|---------------------------------------|------------------------|--------|
| UBQ10-F   | CAC ACT CCA CTT GGT CTT GCG T         | <i>UBQ10</i> /forward  | 22     |
| UBQ10-R   | TGG TCT TTC CGG TGA GAG TCT TCA       | <i>UBQ10</i> /reverse  | 24     |
| RAB18-F   | ATA TGA TGC TGG TGG CTA CG            | <i>RAB18</i> /forward  | 20     |
| RAB18-R   | GAT TGT TCG AAG CTT AAC GGC           | <i>RAB18</i> /reverse  | 21     |
| DREB2A-F  | CGA GGG AAA GGA TGG TAA TGG           | <i>DREB2A</i> /forward | 21     |
| DREB2A-R  | CGT TGT GGG ATT AAG GCA AAT ATC       | <i>DREB2A</i> /reverse | 24     |
| TCH2-F    | AGA AGA TGA TGA GTA ATG GTG GTG       | <i>TCH2</i> /forward   | 24     |
| TCH2-R    | CGC CGT CAC TAA AAT TAA TCT GC        | <i>TCH2</i> /reverse   | 23     |
| TCH3-F    | CAT AGC GGT CGG GGT TG                | <i>TCH3</i> /forward   | 17     |
| TCH3-R    | TGT CAG ACC CTA TTG GCA TAA AG        | <i>TCH3</i> /reverse   | 23     |
| PIP2;3-F  | ACC AAT TCG TTC TAA GGG CC            | <i>PIP2;3</i> /forward | 20     |
| PIP2;3-R  | CGT GGC TAA GTT TAA ACG TTG G         | <i>PIP2;3</i> /reverse | 22     |
| Zat12-F   | AAC ACA AAC CAC AAG AGG ATC A         | <i>ZAT12</i> /forward  | 22     |
| Zat12-R   | AAG CAT CAA ACA ATT CGC CG            | <i>ZAT12</i> /reverse  | 20     |
| AtSOS1-F  | CTT CTT CCT CTG TGT TGT TGC           | <i>SOS1</i> /forward   | 21     |
| AtSOS1-R  | GAA GAC GAA TCG GTC GCT T             | <i>SOS1</i> /reverse   | 19     |
| SOS2-F    | AAG CTA TGT TCG AAA CTG GAA AAC       | <i>SOS2</i> /forward   | 24     |
| SOS2-R    | TGG ATT TAA GTT GGG ATC AAA ACG       | <i>SOS2</i> /reverse   | 24     |
| AtSOS3-F  | AGA AGG GTG TGT TTG TAT GGG           | <i>SOS3</i> /forward   | 21     |
| AtSOS3-R  | GAA GCT CGG GAT CCT CAT ATC           | <i>SOS3</i> /reverse   | 21     |
| AtCBL10-F | ACG ACA GCA TTC CCA AGT T             | <i>CBL10</i> /forward  | 19     |
| AtCBL10-R | CCG GTG TTG CAT GGA CAG               | <i>CBL10</i> /reverse  | 18     |
| AtTPC1-F* | GCT CTA TTG GCG TAC AGG TCT TTG       | <i>TPC1</i> /forward   | 24     |
| AtTPC1-R* | GAA GAG TGT GAC CAT TCC ATT GG        | <i>TPC1</i> /reverse   | 23     |
| LOX3-F    | GTA TGA GTT GAT GGC TCC GAG           | <i>LOX3</i> /forward   | 21     |
| LOX3-R    | ACC ATA CTG CGT CAA AAT CTA ATT ATA T | <i>LOX3</i> /reverse   | 28     |
| SID2-F    | TTG CAG TTC ACC AAG TCA ATT G         | <i>SID2</i> /forward   | 22     |
| SID2-R    | CCC CTT ATC CCC CAT ACA AAC           | <i>SID2</i> /reverse   | 21     |

\*All primers were designed using the Web tools available at [www.IDTDNA.com](http://www.IDTDNA.com) except the TPC1 primers, which were taken from ref. 1. F, forward; R, reverse.

1. Ulker B, et al. (2008) Getting the most out of publicly available T-DNA insertion lines. *Plant J* 56:665–677.

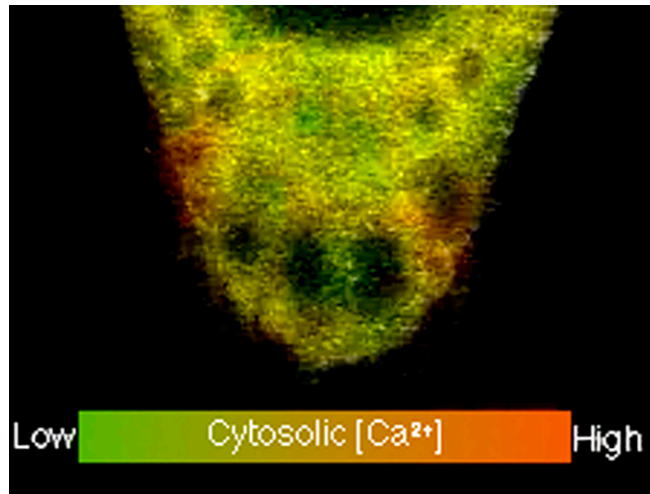

**Movie S1.** Effect of cold shock on cytosolic Ca<sup>2+</sup> at the root tip monitored using *Arabidopsis* expressing the YCNano-65 biosensor and confocal ratio imaging. Movie duration, 88 s (4 s per frame, 22 frames).

[Movie S1](#)

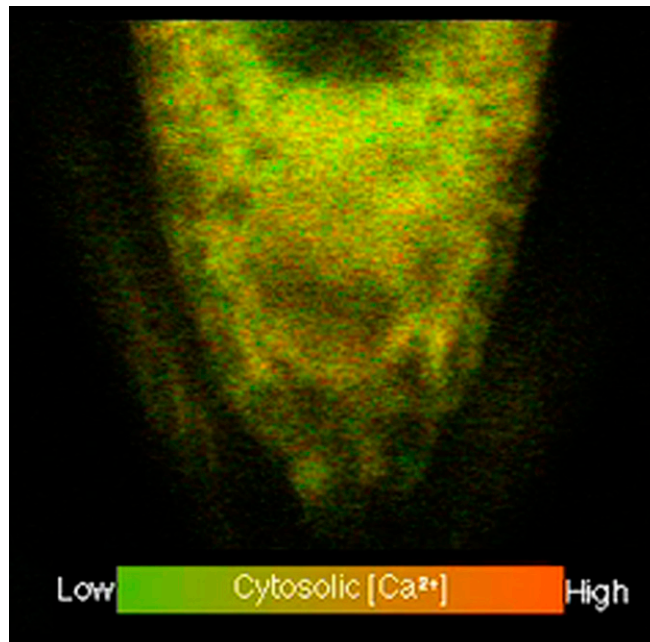

**Movie S2.** Effect of 100  $\mu$ M H<sub>2</sub>O<sub>2</sub> on cytosolic Ca<sup>2+</sup> at the root tip monitored using *Arabidopsis* expressing the YCNano-65 biosensor and confocal ratio imaging. Movie duration, 230 s (4 s per frame, 115 frames).

[Movie S2](#)

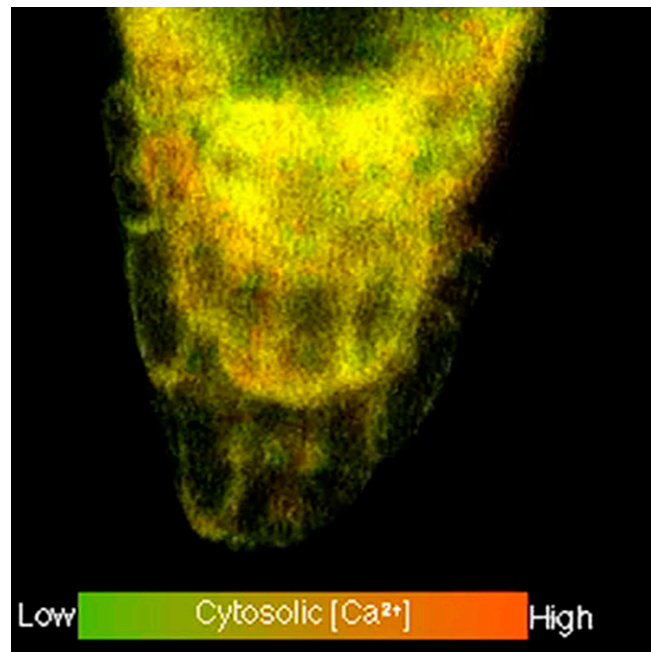

**Movie S3.** Effect of touch stimulation on cytosolic  $\text{Ca}^{2+}$  at the root tip monitored using *Arabidopsis* expressing the YCNano-65 biosensor and confocal ratio imaging. Touch was applied by contact with the tip of a glass micropipette. Movie duration, 200 s (4 s per frame, 50 frames).

[Movie S3](#)

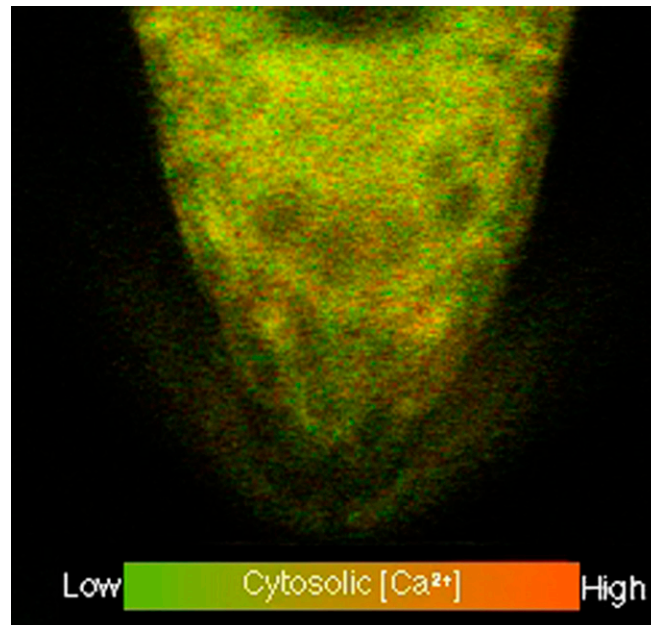

**Movie S4.** Effect of 100 mM NaCl on cytosolic  $\text{Ca}^{2+}$  at the root tip monitored using *Arabidopsis* expressing the YCNano-65 biosensor and confocal ratio imaging. Movie duration, 520 s (4 s per frame, 130 frames).

[Movie S4](#)

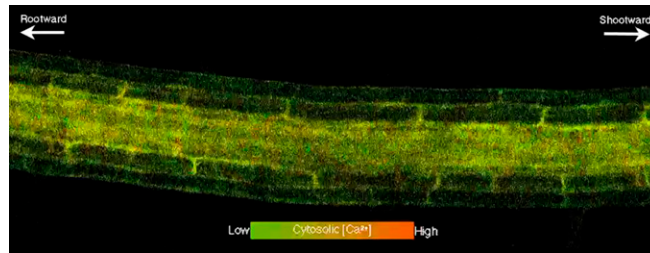

**Movie S5.** Transmission of  $\text{Ca}^{2+}$  wave through tissue shootward of the root tip locally treated with 100 mM NaCl. Cytosolic  $\text{Ca}^{2+}$  was monitored using *Arabidopsis* expressing the YCNano-65 biosensor and confocal ratio imaging. Movie duration, 800 s (4 s per frame, 200 frames).

[Movie S5](#)

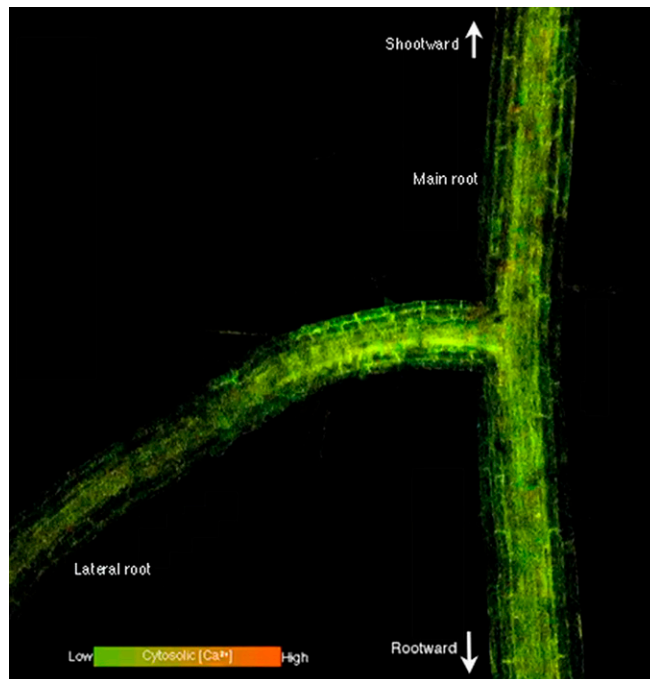

**Movie S6.** Transmission of  $\text{Ca}^{2+}$  wave through lateral root to main root after the root tip of the lateral root was locally treated with 100 mM NaCl. Cytosolic  $\text{Ca}^{2+}$  was monitored using *Arabidopsis* expressing the YCNano-65 biosensor and confocal ratio imaging. Movie duration, 750 s (10 s per frame, 75 frames).

[Movie S6](#)

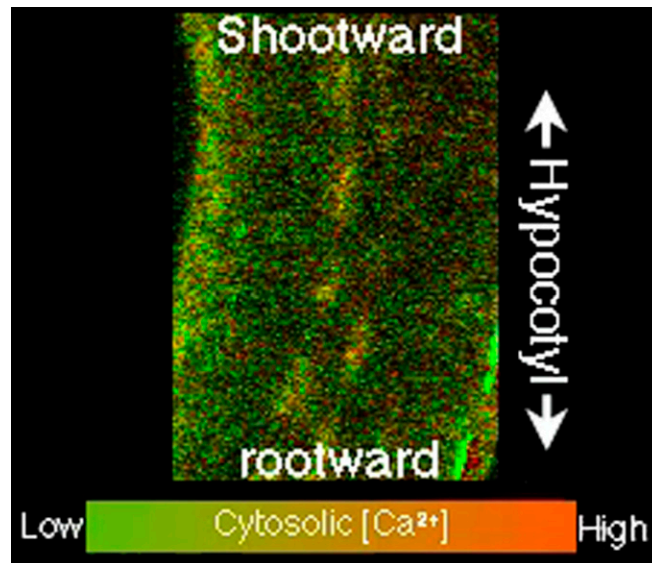

**Movie S7.** Transmission of  $Ca^{2+}$  wave through root tissues and into the hypocotyl shootward of a root tip locally treated with 100 mM NaCl. Cytosolic  $Ca^{2+}$  was monitored using *Arabidopsis* expressing the YCNano-65 biosensor and confocal ratio imaging. Movie duration, 320 s (4 s per frame, 80 frames).

[Movie S7](#)

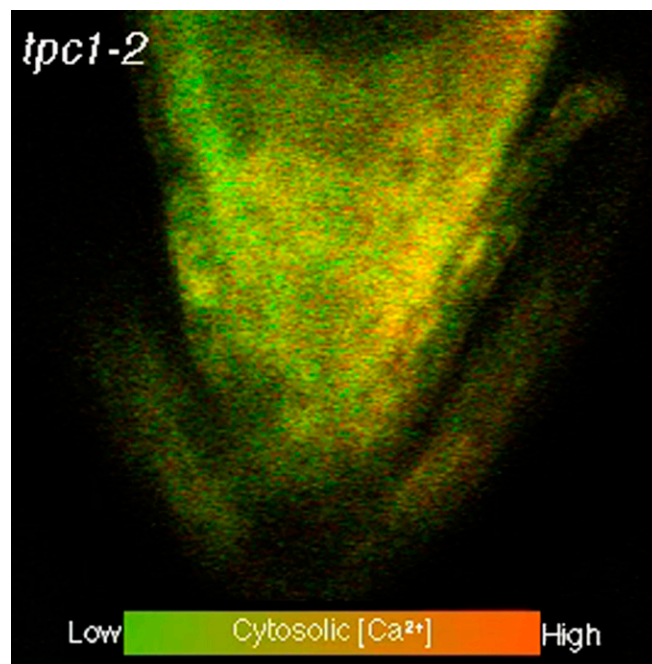

**Movie S8.**  $Ca^{2+}$  increase at the root tip of *tpc1-2* locally treated with 100 mM NaCl. Cytosolic  $Ca^{2+}$  was monitored using *Arabidopsis* expressing the YCNano-65 biosensor and confocal ratio imaging. Movie duration, 480 s (4 s per frame, 120 frames).

[Movie S8](#)
